# Supplementary material for: The preparation of an FITC-carbon dot nanocomposite and using a C-18 reverse phase column to improve the Hg2+ ion sensitivity of the FITC-carbon dot ratiometric fluorescent sensor
Source: Royal Society of Chemistry journal article supplement (doi:10.1039/d2nj05413b), 2022-12-07
Supplement: d2nj05413b1.pdf [file d2nj05413b1.pdf]

Electronic supporting information for:

**The preparation of FITC-carbon dots nanocomposite and using the C-18 reverse  
phase column to improve the Hg<sup>2+</sup> ion sensitivity of FITC-carbon dots  
ratiometric fluorescent sensor**

*Jyun-Ting Li and Chih-Wei Chang\**

Department of Chemistry, National Changhua University of Education, Taiwan

\*Corresponding author: cwchang@cc.ncue.edu.tw

## Table of contents

|                                                                                                                                                                                                                                                                                                                  |     |
|------------------------------------------------------------------------------------------------------------------------------------------------------------------------------------------------------------------------------------------------------------------------------------------------------------------|-----|
| Fig. S1: The TEM images of (a) the CDs( $\alpha$ ) and (b) the FITC-CDs( $\alpha$ ). .....                                                                                                                                                                                                                       | S3  |
| Fig. S2: The steady-state spectra of (a) the CDs( $\alpha$ ) and (b) the FITC.....                                                                                                                                                                                                                               | S4  |
| Fig. S3: (a) the TEM image and (b) the steady state spectra of CDs( $\beta$ ).....                                                                                                                                                                                                                               | S5  |
| Fig. S4: The steady-state spectra of (a) the CDs( $\alpha$ ) and (b) the CDs( $\beta$ ) at various concentrations. ....                                                                                                                                                                                          | S6  |
| Fig. S5: The XPS survey scan for (a) the CDs( $\alpha$ ) and (b) the CDs( $\beta$ ). .....                                                                                                                                                                                                                       | S7  |
| Fig. S6: (a) the steady-state absorption spectra of the FITC labelled on the CDs( $\alpha$ ), the CDs( $\alpha$ ) <sub>ambient</sub> and the CDs( $\alpha$ ) <sub>sealed</sub> .(b) the steady state spectra of the CDs( $\alpha$ ) <sub>sonicated</sub> and the FITC-CDs( $\alpha$ ) <sub>sonicated</sub> ..... | S8  |
| Fig. S7: (a) the XPS survey scan and (b) the FTIR spectra of the CDs( $\alpha$ ) <sub>sonicated</sub> .....                                                                                                                                                                                                      | S9  |
| Fig. S8: The XPS spectra of (a) the CDs( $\alpha$ ) <sup>I</sup> , (b) the CDs( $\alpha$ ) <sup>II</sup> and (c) the CDs( $\alpha$ ) <sup>III</sup> .....                                                                                                                                                        | S10 |

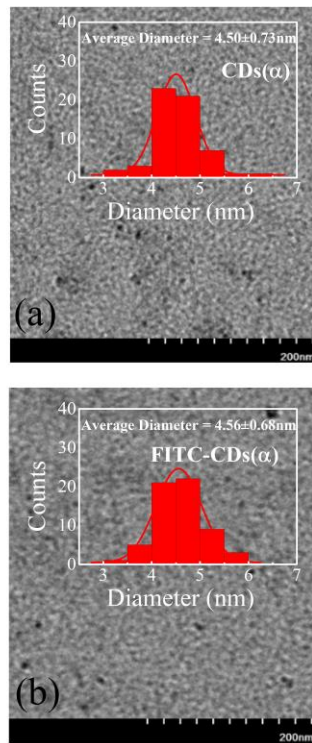

Fig. S1: The TEM images of (a) the CDs( $\alpha$ ) and (b) the FITC-CDs( $\alpha$ ).

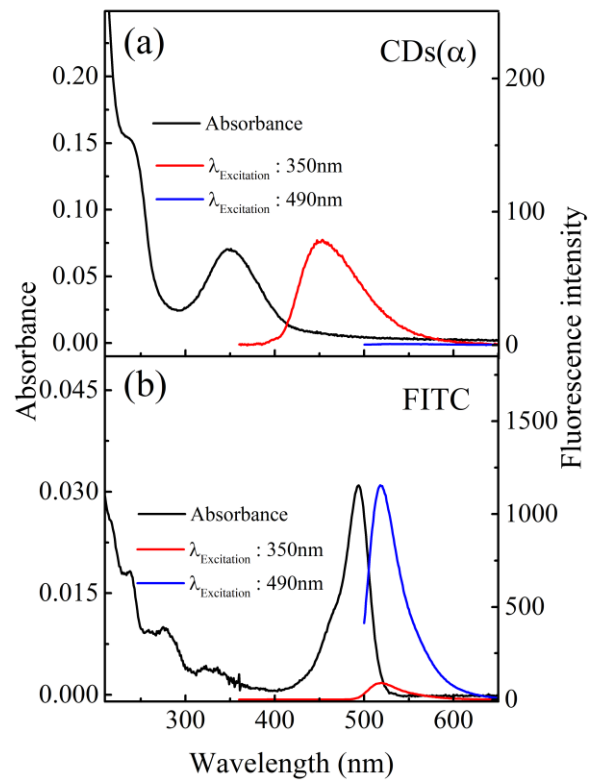

Fig. S2: The steady-state spectra of (a) the CDs( $\alpha$ ) and (b) the FITC.

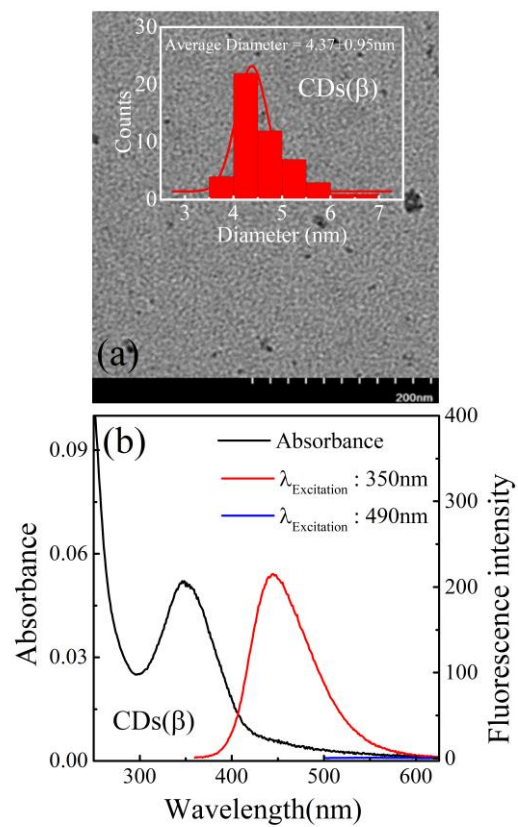

Fig. S3: (a) the TEM image and (b) the steady state spectra of CDs( $\beta$ )

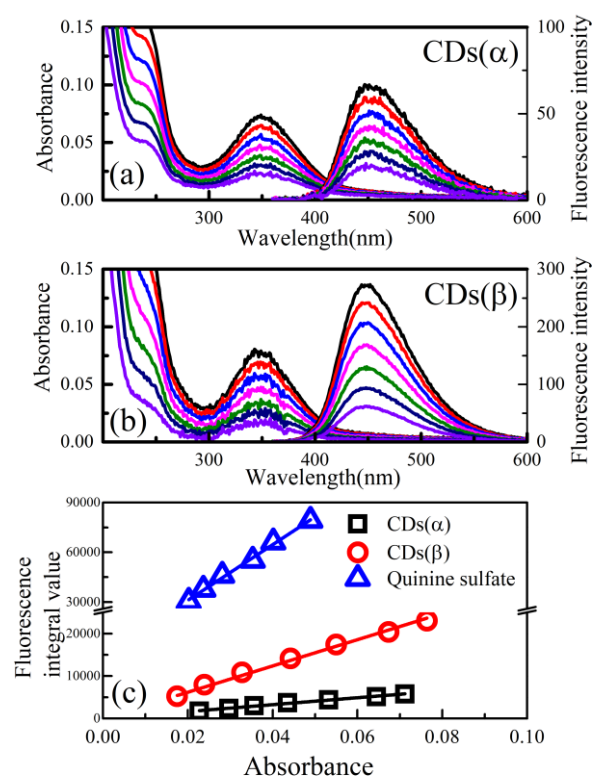

Fig. S4: The steady-state spectra of (a) the CDs( $\alpha$ ) and (b) the CDs( $\beta$ ) at various concentrations.

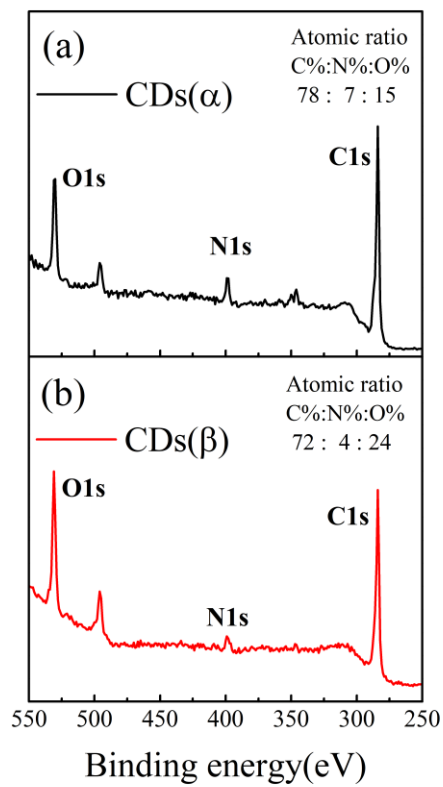

Fig. S5: The XPS survey scan for (a) the CDs( $\alpha$ ) and (b) the CDs( $\beta$ ).

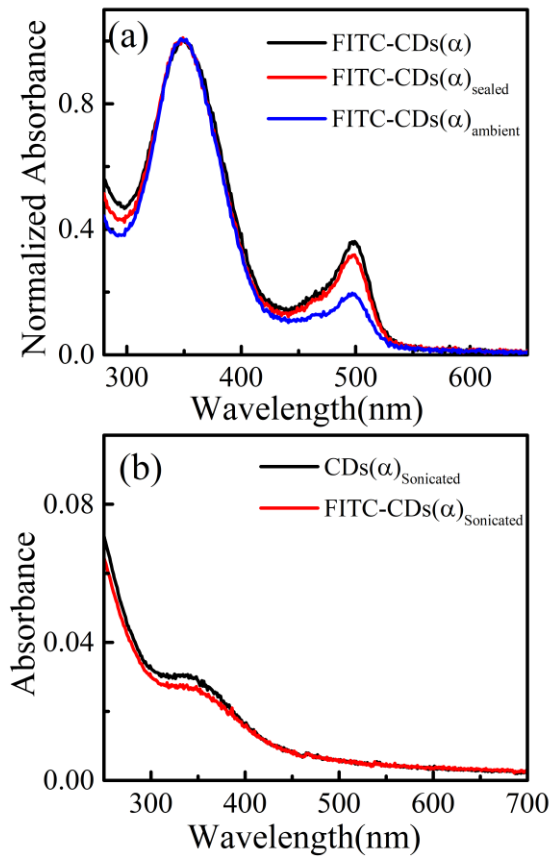

Fig. S6: (a) the steady-state absorption spectra of the FITC labelled on the CDs( $\alpha$ ), the CDs( $\alpha$ )<sub>ambient</sub> and the CDs( $\alpha$ )<sub>sealed</sub>.(b) the steady state spectra of the CDs( $\alpha$ )<sub>sonicated</sub> and the FITC-CDs( $\alpha$ )<sub>sonicated</sub>.



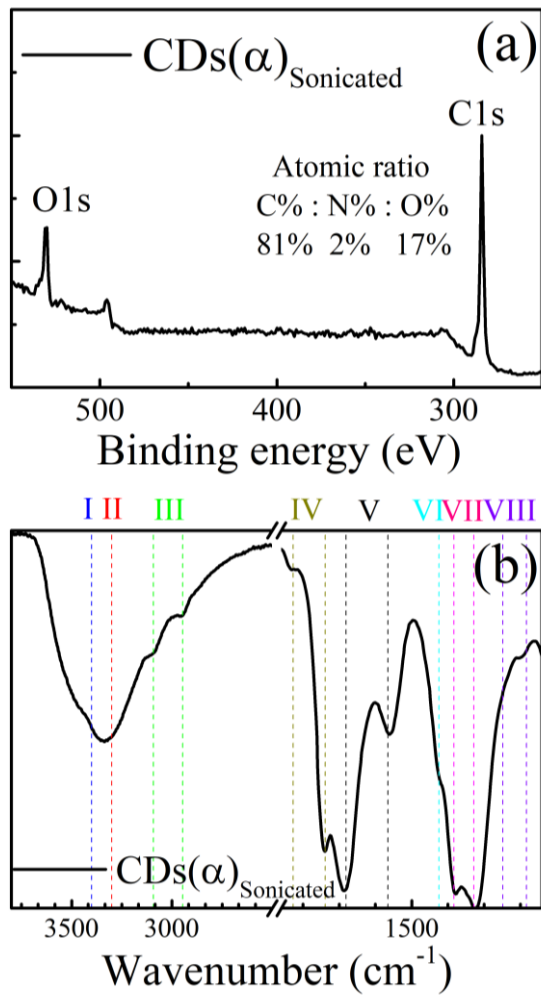

Fig. S7: (a) the XPS survey scan and (b) the FTIR spectra of the  $\text{CDs}(\alpha)_{\text{sonicated}}$ .

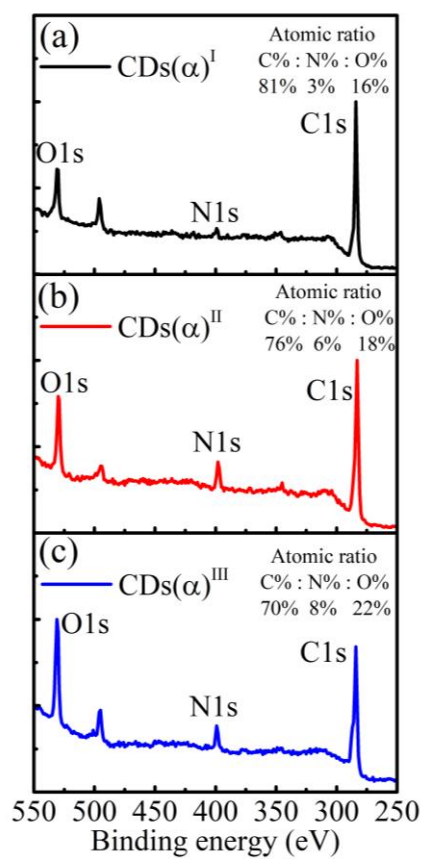

Fig. S8: The XPS spectra of (a) the CDs( $\alpha$ )<sup>I</sup>, (b) the CDs( $\alpha$ )<sup>II</sup> and (c) the CDs( $\alpha$ )<sup>III</sup>
